# Supplementary material
Source: PubMed Central journal article supplement (PMC7362037)
Supplement: BIOM-77-929-s001.pdf [file BIOM-77-929-s001.pdf]

**Supporting Information for ‘Estimation of  
Incubation Period and Generation Time Based on Observed  
Length-biased Epidemic Cohort with Censoring for COVID-19  
Outbreak in China’ by Deng et al.**

**Web Appendix A.**

Here three parametric forms are used to fit the distribution of incubation period (inter-arrival time)  $I$ , they are Gamma distribution, Weibull distribution and Log-normal distribution. Let  $f_I$  and  $h$  be the pdf of  $I$  and  $V$  respectively, and let  $F_I$  and  $H$  be the cdf of  $I$  and  $V$  respectively.

Example 1. Suppose that  $I \sim \Gamma(\alpha, \beta)$  with density

$$f_I(t; \boldsymbol{\theta}) = \frac{\beta^\alpha}{\Gamma(\alpha)} t^{\alpha-1} e^{-\beta t} \quad (t > 0),$$

where  $\boldsymbol{\theta} = (\alpha, \beta)^\top$  is unknown ( $\alpha > 0, \beta > 0$ ), then

$$h(t; \boldsymbol{\theta}) = \frac{\beta}{\alpha} [1 - \Gamma(t, \alpha, \beta)] \quad (t > 0),$$

$$H(t; \boldsymbol{\theta}) = \Gamma(t, \alpha + 1, \beta) + \frac{\beta t}{\alpha} [1 - \Gamma(t, \alpha, \beta)] \quad (t > 0),$$

where  $\Gamma(u, \alpha, \beta)$  is the cdf of  $\Gamma(\alpha, \beta)$  at  $u$ .

Example 2. Suppose that  $I \sim W(k, \lambda)$  with density

$$f_I(t; \boldsymbol{\theta}) = \frac{k}{\lambda} \left(\frac{t}{\lambda}\right)^{k-1} \exp\left\{-\left(\frac{t}{\lambda}\right)^k\right\} \quad (t > 0),$$

where  $\boldsymbol{\theta} = (k, \lambda)^\top$  is unknown ( $k > 0, \lambda > 0$ ), then

$$h(t; \boldsymbol{\theta}) = \frac{k}{\lambda} \Gamma\left(\frac{1}{k}\right)^{-1} \exp\left\{-\left(\frac{t}{\lambda}\right)^k\right\} \quad (t > 0),$$

$$H(t; \boldsymbol{\theta}) = \Gamma\left(\left(\frac{t}{\lambda}\right)^k, \frac{1}{k}, 1\right) \quad (t > 0).$$

Example 3. Suppose that  $I \sim LN(\mu, \sigma^2)$  with density

$$f_I(t; \boldsymbol{\theta}) = \frac{1}{\sqrt{2\pi\sigma^2 t}} \exp \left\{ -\frac{(\log t - \mu)^2}{2\sigma^2} \right\} \quad (t > 0),$$

where  $\boldsymbol{\theta} = (\mu, \sigma^2)^\top$  is unknown ( $\sigma > 0$ ), then

$$h(t; \boldsymbol{\theta}) = \exp \left\{ -\mu - \frac{1}{2}\sigma^2 \right\} [1 - \Phi(\log t, \mu, \sigma^2)] \quad (t > 0),$$

$$H(t; \boldsymbol{\theta}) = \Phi(\log t, \mu + \sigma^2, \sigma^2) + t \exp \left\{ -\mu - \frac{1}{2}\sigma^2 \right\} [1 - \Phi(\log t, \mu, \sigma^2)] \quad (t > 0),$$

where  $\Phi(u, \mu, \sigma^2)$  is the cdf of normal distribution  $N(\mu, \sigma^2)$  at  $u$ .

## Web Appendix B. Likelihood approach for the mixture distribution

The log-likelihood of the mixture distribution can be derived by introducing a latent variable. Specifically, denote  $\delta_j = 1$  if the  $j$ th individual in our cohort got infected at the departure,  $\delta_j = 0$  if the individual got infected before departure, and  $t_j$  to be the observed time difference from the event of leaving Wuhan to symptoms onset for  $j = 1, \dots, m$ . Note that only  $\{t_1, \dots, t_m\}$  are observed, and  $\{\delta_1, \dots, \delta_m\}$  are unobserved. We can rewrite this problem as a mixture distribution below,

$$\delta_j \sim Bin(1, \pi), \quad j = 1, \dots, m.$$

$$t_j \mid (\delta_j = 1) \sim f_I^p(\cdot; \boldsymbol{\theta}), \quad t_j \mid (\delta_j = 0) \sim h^p(\cdot; \boldsymbol{\theta}),$$

and the conditional likelihood is

$$\begin{aligned} L(\boldsymbol{\theta}; t_1, \dots, t_m \mid \delta_1, \dots, \delta_m) &= \prod_{j=1}^m \{f_I^p(t_j; \boldsymbol{\theta})\}^{\delta_j} \{h^p(t_j; \boldsymbol{\theta})\}^{1-\delta_j} \\ &= \prod_{j=1}^m \{\delta_j f_I^p(t_j; \boldsymbol{\theta}) + (1 - \delta_j) h^p(t_j; \boldsymbol{\theta})\}. \end{aligned}$$

By integrating the unobservable  $\{\delta_1, \dots, \delta_m\}$  out, the likelihood is reduced to

$$L(\boldsymbol{\theta}, \pi; t_1, \dots, t_m) = \prod_{j=1}^m \{\pi f_I^p(t_j; \boldsymbol{\theta}) + (1 - \pi) h^p(t_j; \boldsymbol{\theta})\}.$$

Hence, the estimates of parameters can be obtained by Newton-Raphson or EM algorithm (Dempster et al., 1977; Booth and Hobert, 1999). Note that extra cautions need to be taken when an EM algorithm is implemented due to the local maximum issue.

## Web Appendix C. Proof of Theorem 1 and 2

To study the large-sample properties of the MLE and the likelihood ratio statistics  $R_1(\boldsymbol{\theta}_0, \pi_0)$  and  $R_2(\pi_0)$ , we consider the behavior of  $\ell(\boldsymbol{\theta}, \pi)$  for  $(\boldsymbol{\theta}^\top, \pi)^\top = (\boldsymbol{\theta}_0^\top, \pi_0)^\top + n^{-1/2}\boldsymbol{\xi}$  with  $\boldsymbol{\xi} = (\boldsymbol{\xi}_1^\top, \boldsymbol{\xi}_2^\top)^\top = O_p(1)$ .

By second-order Taylor expansion and weak law of large numbers, we have

$$\ell((\boldsymbol{\theta}_0^\top, \pi_0)^\top + m^{-1/2}\boldsymbol{\xi}) = \ell(\boldsymbol{\theta}_0, \pi_0) + \boldsymbol{u}_m^\top \boldsymbol{\xi} - \frac{1}{2}\boldsymbol{\xi}^\top U \boldsymbol{\xi} + r_m \boldsymbol{\xi}^\top \boldsymbol{\xi}, \quad (\text{S1})$$

where  $r_m = o_p(1)$  uniformly for all  $(\boldsymbol{\theta}, \pi)$  in a neighborhood of  $(\boldsymbol{\theta}_0, \pi_0)$ ,

$$\begin{aligned} u_{m1} &= m^{-1/2} \sum_{i=1}^m \frac{\pi_0 \nabla_{\boldsymbol{\theta}} f_I^p(t; \boldsymbol{\theta}_0) + (1 - \pi_0) \nabla_{\boldsymbol{\theta}} h^p(t; \boldsymbol{\theta}_0)}{\pi_0 f_I^p(t; \boldsymbol{\theta}_0) + (1 - \pi_0) h^p(t; \boldsymbol{\theta}_0)}, \\ u_{m2} &= m^{-1/2} \sum_{i=1}^m \frac{f_I^p(t; \boldsymbol{\theta}_0) - h^p(t; \boldsymbol{\theta}_0)}{\pi_0 f_I^p(t; \boldsymbol{\theta}_0) + (1 - \pi_0) h^p(t; \boldsymbol{\theta}_0)}, \end{aligned}$$

and  $U = (U_{ij})_{1 \leq i, j \leq 2}$  with

$$\begin{aligned} U_{11} &= E \left\{ \frac{\pi_0 \nabla_{\boldsymbol{\theta}} f_I^p(t; \boldsymbol{\theta}_0) + (1 - \pi_0) \nabla_{\boldsymbol{\theta}} h^p(t; \boldsymbol{\theta}_0)}{\pi_0 f_I^p(t; \boldsymbol{\theta}_0) + (1 - \pi_0) h^p(t; \boldsymbol{\theta}_0)} \right\}^{\otimes 2}, \\ U_{12} &= E \left[ \frac{\{\pi_0 \nabla_{\boldsymbol{\theta}} f_I^p(t; \boldsymbol{\theta}_0) + (1 - \pi_0) \nabla_{\boldsymbol{\theta}} h^p(t; \boldsymbol{\theta}_0)\} \{\nabla_{\boldsymbol{\theta}} f_I^p(t; \boldsymbol{\theta}_0) - \nabla_{\boldsymbol{\theta}} h^p(t; \boldsymbol{\theta}_0)\}^\top}{\{\pi_0 f_I^p(t; \boldsymbol{\theta}_0) + (1 - \pi_0) h^p(t; \boldsymbol{\theta}_0)\}^2} \right], \\ U_{22} &= E \left\{ \frac{f_I^p(t; \boldsymbol{\theta}_0) - h^p(t; \boldsymbol{\theta}_0)}{\pi_0 f_I^p(t; \boldsymbol{\theta}_0) + (1 - \pi_0) h^p(t; \boldsymbol{\theta}_0)} \right\}^2. \end{aligned}$$

Here  $A^{\otimes 2} = AA^\top$  for a vector or matrix  $A$ . It is straightforward to see that  $\text{var}(u_m) = U$  and  $u_m \xrightarrow{d} N(0, U)$ .

Let  $\widehat{\boldsymbol{\xi}} = (\widehat{\boldsymbol{\xi}}_1^\top, \widehat{\boldsymbol{\xi}}_2^\top)^\top = \sqrt{m}((\widehat{\boldsymbol{\theta}} - \boldsymbol{\theta}_0)^\top, \widehat{\pi} - \pi_0)^\top$ . If  $(\boldsymbol{\theta}_0, \pi_0)$  is an interior point of the parameter space, it follows from (S1) that the MLE  $(\widehat{\boldsymbol{\theta}}^\top, \widehat{\pi})^\top = (\boldsymbol{\theta}_0^\top, \pi_0)^\top + m^{-1/2}\widehat{\boldsymbol{\xi}}$  satisfies

$$\widehat{\boldsymbol{\xi}} = U^{-1}u_m + o_p(1) \xrightarrow{d} N(0, U^{-1}),$$

and that

$$R(\boldsymbol{\theta}_0, \pi_0) = 2u_m^\top \widehat{\xi} - \widehat{\xi}^\top U \widehat{\xi} + o_p(1) = u_m^\top U^{-1} u_m + o_p(1) \xrightarrow{d} \chi_{q_\theta+1}^2,$$

where  $q_\theta$  is the dimension of  $\boldsymbol{\theta}$ . Similarly it is straightforward to see that  $R_2(\pi_0) \xrightarrow{d} \chi_1^2$ . This proves Theorem 1.

To proving Theorem 2, we re-express (S1) as

$$\begin{aligned} \ell((\boldsymbol{\theta}_0^\top, \pi_0)^\top + m^{-1/2}\xi) &= \ell(\boldsymbol{\theta}_0, \pi_0) + u_{m1}^\top \xi_1 + u_{m2}^\top \xi_2 \\ &\quad - \frac{1}{2} \xi_1^\top U_{11} \xi_1 - \xi_1^\top U_{12} \xi_2 - \frac{1}{2} \xi_2^\top U_{22} \xi_2 + r_m \xi^\top \xi \\ &= \ell(\boldsymbol{\theta}_0^\top, \pi_0)^\top + \frac{1}{2} u_{m1}^\top U_{11}^{-1} u_{m1} \\ &\quad - \frac{1}{2} \{ \xi_1 - U_{11}^{-1}(u_{m1} - U_{12} \xi_2) \}^\top U_{11} \{ \xi_1 - U_{11}^{-1}(u_{m1} - U_{12} \xi_2) \} \\ &\quad + u_{m1}^\top U_{11}^{-1} U_{12} \xi_2 - \frac{1}{2} \xi_2^\top (U_{22} - U_{12}^\top U_{11}^{-1} U_{12}) \xi_2 + r_m \xi^\top \xi. \end{aligned} \quad (\text{S2})$$

Because  $\boldsymbol{\theta}_0$  is an interior point, when  $m$  is large,  $\xi_1$  is free from any constraint. For any fixed  $\xi_2$ , taking maximum in (S2) with respect to  $\xi_1$  leads to

$$\xi_1 = U_{11}^{-1}(u_{m1} - U_{12} \xi_2) + r_{m1}, \quad (\text{S3})$$

where  $r_{m1} = o_p(1)$  uniformly. Putting this back in (S2), we have the profile log-likelihood

$$\ell_p(\pi_0 + m^{-1/2}\xi_2) = (u_{m2} - U_{21} U_{11}^{-1} u_{m1}) \xi_2 - \frac{1}{2} (U_{22} - U_{12}^\top U_{11}^{-1} U_{12}) \xi_2^2 + C + r_{m2} \xi_2^2,$$

where  $C$  does not depend on  $\xi_2$  and  $r_{m2} = o_p(1)$  uniformly.

Because  $\pi \leq \pi_0 = 1$ ,  $\xi_2$  takes only non-positive values, and  $\ell_p(\pi_0 + m^{-1/2}\xi_2)$  takes its maximum at

$$\widehat{\xi}_2 = (U_{22} - U_{12}^\top U_{11}^{-1} U_{12})^{-1} (u_{m2} - U_{21} U_{11}^{-1} u_{m1})_- + o_p(1),$$

where  $x_- = \min\{x, 0\}$ . Putting  $\widehat{\xi}_2$  back into (S3) leads to an approximate of  $\widehat{\xi}_1$ , i.e.,

$$\widehat{\xi}_1 = U_{11}^{-1} \{ u_{m1} - U_{12} (U_{22} - U_{12}^\top U_{11}^{-1} U_{12})^{-1} (u_{m2} - U_{21} U_{11}^{-1} u_{m1})_- \} + o_p(1).$$

The fact  $u_m \xrightarrow{d} N(0, U)$  implies that  $u_{m1} \xrightarrow{d} N(0, U_{11})$  and

$$u_{m2} - U_{21} U_{11}^{-1} u_{m1} \xrightarrow{d} N(0, U_{22} - U_{12}^\top U_{11}^{-1} U_{12}),$$

and that they are asymptotically independent. This immediately implies result (a) of Theorem 3.

It follows from the approximates of the MLEs and (S2) that

$$\begin{aligned} R_2(\pi_0) &= \widehat{\xi}_2^\top (U_{22} - U_{12}^\top U_{11}^{-1} U_{12}) \widehat{\xi}_2 + o_p(1) \\ &= \frac{(u_{m2} - U_{21} U_{11}^{-1} u_{m1})_-^2}{U_{22} - U_{12}^\top U_{11}^{-1} U_{12}} + o_p(1) \\ &\xrightarrow{d} \frac{1}{2} \chi_0^2 + \frac{1}{2} \chi_1^2, \end{aligned}$$

and

$$\begin{aligned} R_1(\boldsymbol{\theta}_0, \pi_0) &= u_{m1}^\top U_{11}^{-1} u_{m1} + \frac{(u_{m2} - U_{21} U_{11}^{-1} u_{m1})_-^2}{U_{22} - U_{12}^\top U_{11}^{-1} U_{12}} + o_p(1) \\ &\xrightarrow{d} \frac{1}{2} \chi_{q_\theta}^2 + \frac{1}{2} \chi_{q_\theta+1}^2. \end{aligned}$$

This proves Theorem 3. It is similar to prove the circumstance if  $\pi_0 = 0$ .  $\square$

## Web Appendix D. Conditions and properties for deconvolution

Suppose the incubation period  $I$  follows a Gamma distribution  $\Gamma(\alpha, \beta)$  with pdf  $f_I$ , then the characteristic function (chf) of  $I$  satisfies

$$\phi_I(t) = \left(1 - \frac{it}{\beta}\right)^{-\alpha} \quad \text{and} \quad |\phi_I(t)|^2 = \left(\frac{\beta^2}{\beta^2 + t^2}\right)^\alpha.$$

According to Liu and Taylor (1989) and Devroye (1989), under the following conditions, the estimator for  $f_G$  in (13) at its interior point is consistent:

- (C1).  $\phi_S(t)/|\phi_I(t)|^2$  is absolutely integrable.
- (C2). The second order derivative of  $f_G(y)$  exists and is continuous on  $[0, +\infty)$ .
- (C3). The chf of  $I$   $\phi_I(t) \neq 0$  for almost all  $t$ .
- (C4). The kernel chf  $\phi_K(t)$  vanishes at  $|t| > M$  for some  $M$ .
- (C5).  $M_n \rightarrow \infty$  and  $h_n \rightarrow 0$  as  $n \rightarrow \infty$ .

The aim of the kernel  $K(\cdot)$  is to smooth the empirical chf of  $S$  into an integrable function. It is known that the best kernels are those whose chfs are the flattest near the

origin (Davis, 1975, 1977). The bias of  $\widehat{f}_G(y)$  is

$$\text{bias}\{\widehat{f}_G(y)\} = \frac{1}{2}h^2 f_G(y) \int_{-\infty}^{y/h_n} t^2 K_c(t) dt + o(h_n^2),$$

where  $K_c(t) = a_0 K(t) + a_1 K'(t)$  and

$$\begin{pmatrix} a_0 \\ a_1 \end{pmatrix} = \begin{pmatrix} \int_{-\infty}^{y/h_n} K(t) dt & \int_{-\infty}^{y/h_n} K'(t) dt \\ \int_{-\infty}^{y/h_n} tK(t) dt & \int_{-\infty}^{y/h_n} tK'(t) dt \end{pmatrix}^{-1} \begin{pmatrix} 1 \\ 0 \end{pmatrix}.$$

The variance of  $\widehat{f}_G(y)$  is given in Karunamuni (2009).

An alternative to nonparametric density estimation is the parametric approach. To accord with the generation mechanism of serial interval, it is more reasonable to post a parametric model on generation time rather than serial interval theoretically. A potential weakness for directly modeling the serial interval is model misspecification. An additional condition should be satisfied to make  $\widehat{\phi}_G$  a proper chf:

$$(C6). |\widehat{\phi}_S(t)|/|\phi_I(t)|^2 \leq 1.$$

This condition requires that the norm of estimated chf for  $S$  be declining fast near the origin and is too strong for modeling observed data. For example, normal  $S$  and Gamma  $I$  may not satisfy (C6).

## Web Appendix E. The goodness-of-fit test for incubation period modeling

The goodness-of-fit test is performed as follows. Divide the non-negative real line into 17 parts:  $[k - 1.5, k - 0.5)$  for  $k = 1, \dots, 16$ , and  $[15.5, +\infty)$ . The goodness-of-fit  $\chi^2$  statistic is

$$X^2 = \sum_{k=1}^{17} \frac{(O_k - E_k)^2}{E_k},$$

where  $E_k$  and  $O_k$  are the expected and observed number of cases in the  $k$ th interval:

$$E_k = m[\widehat{\pi}F_I(k - 0.5; \widehat{\theta}) + (1 - \widehat{\pi})H(k - 0.5; \widehat{\theta})] - m[\widehat{\pi}F_I(k - 1.5; \widehat{\theta}) + (1 - \widehat{\pi})H(k - 1.5; \widehat{\theta})].$$

The degree of freedom of  $X^2$  is  $17 - 3 - 1 = 13$ , since there are three parameters in total. The 0.95 quantile of chi-squared distribution with 13 degrees of freedom is 22.36.

## References

- Booth, J. G. and Hobert, J. P. (1999). Maximizing generalized linear mixed model likelihoods with an automated monte carlo em algorithm. *Journal of the Royal Statistical Society: Series B (Statistical Methodology)* **61**, 265–285.
- Davis, K. B. (1975). Mean square error properties of density estimates. *The Annals of Statistics* pages 1025–1030.
- Davis, K. B. (1977). Mean integrated square error properties of density estimates. *The Annals of Statistics* pages 530–535.
- Dempster, A. P., Laird, N. M., and Rubin, D. B. (1977). Maximum likelihood from incomplete data via the em algorithm. *Journal of the Royal Statistical Society: Series B (Methodological)* **39**, 1–22.
- Devroye, L. (1989). Consistent deconvolution in density estimation. *The Canadian Journal of Statistics/La Revue Canadienne de Statistique* pages 235–239.
- Karunamuni, R. J. (2009). Deconvolution boundary kernel method in nonparametric density estimation. *Journal of Statistical Planning & Inference* **139**, 2269–2283.
- Liu, M. C. and Taylor, R. L. (1989). A consistent nonparametric density estimator for the deconvolution problem. *Canadian Journal of Statistics* **17**, 427–438.
